# 1 **A 1-bp deletion in bovine *QRICH2* causes low sperm count** 2 **and immotile sperm with multiple morphological** 3 **abnormalities**

4  
5 Maya Hiltpold<sup>1,#</sup>, Fredi Janett<sup>2</sup>, Xena Marie Mapel<sup>1</sup>, Naveen Kumar Kadri<sup>1</sup>, Zih-Hua Fang<sup>1,\*</sup>,  
6 Hermann Schwarzenbacher<sup>3</sup>, Franz R Seefried<sup>5</sup>, Mirjam Spengeler<sup>5</sup>, Ulrich Witschi<sup>4</sup>, and  
7 Hubert Pausch<sup>1</sup>

8  
9 <sup>1</sup>Animal Genomics, Institute of Agricultural Sciences, ETH Zürich, Universitätstrasse 2,  
10 8092 Zürich, Switzerland

11 <sup>2</sup>Clinic of Reproductive Medicine, Vetsuisse Faculty, University of Zürich,  
12 Winterthurerstrasse 260, 8057 Zürich, Switzerland

13 <sup>3</sup>ZuchtData EDV Dienstleistungen, Dresdner Straße 89/B1/18, 1200 Wien, Austria

14 <sup>4</sup>Swissgenetics, Meielenfeldweg 12, 3052 Zollikofen, Switzerland

15 <sup>5</sup>Qualitas AG, Chamerstrasse 56, 6300 Zug, Switzerland

16 \*Current address: Genome Biology of Neurodegenerative Diseases, Deutsches Zentrum für  
17 Neurodegenerative Erkrankungen e. V. (DZNE), Otfried-Müller-Str. 23, 72076 Tübingen,  
18 Germany

## 19 20 **# Corresponding author**

21 Maya Hiltpold  
22 ETH Zurich  
23 Animal Genomics, Institute of Agricultural Sciences (IAS)  
24 Universitätstrasse 2 | LFW A58  
25 8092 Zürich, Switzerland  
26 [maya.hiltpold@usys.ethz.ch](mailto:maya.hiltpold@usys.ethz.ch)  
27 [www.ag.ethz.ch](http://www.ag.ethz.ch)

## 28 29 30 **email-addresses**

31 MH: [maya.hiltpold@usys.ethz.ch](mailto:maya.hiltpold@usys.ethz.ch)  
32 FJ: [fredi.janett@uzh.ch](mailto:fredi.janett@uzh.ch)  
33 XMM: [xenamarie.mapel@usys.ethz.ch](mailto:xenamarie.mapel@usys.ethz.ch)  
34 NKK: [naveen.kadri@usys.ethz.ch](mailto:naveen.kadri@usys.ethz.ch)  
35 ZHF: [zih-hua.fang@dzne.de](mailto:zih-hua.fang@dzne.de)  
36 HS: [schwarzenbacher@zuchtdata.at](mailto:schwarzenbacher@zuchtdata.at)  
37 FRS: [franz.seefried@qualitasag.ch](mailto:franz.seefried@qualitasag.ch)  
38 MS: [mirjam.spengeler@qualitasag.ch](mailto:mirjam.spengeler@qualitasag.ch)  
39 UW: [uwi@swissgenetics.ch](mailto:uwi@swissgenetics.ch)  
40 HP: [hubert.pausch@usys.ethz.ch](mailto:hubert.pausch@usys.ethz.ch)

## 41 **Abstract**

## 42 **Background**

43 Semen quality and male fertility are monitored in artificial insemination bulls to ensure high  
44 insemination success rates. Only ejaculates that fulfill minimum quality requirements are  
45 processed and eventually used for artificial inseminations. We examined 70,990 ejaculates  
46 from 1343 Brown Swiss bulls to identify bulls from which all ejaculates were rejected due to  
47 low semen quality. This procedure identified a bull that produced twelve ejaculates with an  
48 aberrantly low number of sperm ( $0.2 \pm 0.2 \times 10^9$  sperm per ml) which were mostly immotile  
49 due to multiple morphological abnormalities.

## 50 **Results**

51 The genome of the bull was sequenced at 12-fold coverage to investigate a suspected genetic  
52 cause. Comparing the sequence variant genotypes of the bull with those from 397 fertile bulls  
53 revealed a 1-bp deletion in the coding sequence of *QRICH2* encoding glutamine rich 2 as a  
54 compelling candidate causal variant. The 1-bp deletion causes a frameshift in translation and  
55 induces a premature termination codon (ENSBTAP00000018337.1:p.Cys1644AlafsTer52).  
56 The analysis of testis transcriptomes from 76 bulls showed that the transcript with the  
57 premature termination codon is subjected to nonsense-mediated mRNA decay. The 1-bp  
58 deletion resides on a 675 kb haplotype spanning 181 SNPs from the Illumina BovineHD  
59 Bead chip. The haplotype segregates at a frequency of 5% in the Brown Swiss cattle  
60 population. This analysis also identified another bull that carried the 1-bp deletion in the  
61 homozygous state. Semen analyses from the second bull confirmed low sperm concentration  
62 and immotile sperm with multiple morphological abnormalities primarily affecting the sperm  
63 flagellum and, to a lesser extent, the sperm head.

## 64 **Conclusions**

65 A recessive loss-of-function allele of bovine *QRICH2* likely causes low sperm concentration  
66 and immotile sperm with multiple morphological abnormalities. Routine sperm analyses  
67 unambiguously identify homozygous bulls. A direct gene test can be implemented to monitor  
68 the frequency of the undesired allele in cattle populations.

## 69 **Background**

70 Semen quality and male fertility are complex traits with low to moderate heritabilities [1].  
71 These traits are routinely monitored in thousands of bulls as a service from the semen  
72 collection centres to the cattle breeding industry to ensure high success rates in artificial  
73 insemination. Large cohorts with repeated semen quality analyses facilitate separating genetic  
74 from environmental factors as well as differentiating between female and male factors  
75 contributing to variation in reproduction [2]. Such phenotypes are ideally suited to  
76 characterize the genetic architecture of male fertility [3].

77 Genome-wide association testing revealed quantitative trait loci (QTL) for semen quality and  
78 male fertility in various breeds of cattle, many of them expressing non-additive effects  
79 [4],[5],[6]. The routine evaluation and recording of tens-of thousands of ejaculates and  
80 millions of artificial inseminations also occasionally detect bulls with aberrant semen quality  
81 or strikingly low insemination success rates. Although diseases and environmental exposures  
82 can compromise male fertility [7], drastically reduced semen quality in individual bulls often  
83 results from monogenic disorders [8],[9],[10],[11]. Genome-wide case-control association  
84 testing facilitates pinpointing variants for such conditions. In this approach, genotypes at  
85 genome-wide markers are compared between affected bulls and an unaffected control group.  
86 Variants at which the genotypes differ between both groups are candidate causal variants that  
87 are subsequently subjected to further functional investigations.

88 Impaired semen quality and low fertility in healthy bulls can result from deleterious alleles in  
89 genes that show testis-biased or testis-specific expression [8],[10],[9]. Such alleles are spread  
90 disproportionately by females because they are typically not impacted by defective genes that  
91 are primarily expressed in the male reproductive system. Semen quality and male fertility are  
92 only evaluated in breeding bulls. Thus, recessive variants that compromise male reproduction  
93 can remain undetected in cattle populations for a long period of time or reach high allele  
94 frequency without being recognized [8].

95 Here we report a frameshift-inducing 1-bp deletion in bovine *QRICH2* that likely causes male  
96 infertility in the homozygous state due to immotile sperm with multiple morphological  
97 abnormalities. Using historic and current semen quality data from two Brown Swiss bulls, we  
98 show that this allele remained undetected although phenotypic consequences became

99 manifest almost two decades ago. Our findings offer the opportunity to implement direct  
100 gene testing to monitor the frequency of the undesired allele in cattle populations.

101

## 102 **Material and Methods**

### 103 **Animals and phenotypes**

104 We assessed records for 70,990 ejaculates that were collected from 1343 Brown Swiss bulls  
105 between January 2000 and March 2018. All ejaculates were examined by laboratory  
106 technicians employed by Swissgenetics immediately after semen collection as part of routine  
107 quality assurance during semen processing. Parameters recorded were semen volume (in ml),  
108 sperm concentration (million sperm per ml) quantified using photometric analysis, and the  
109 percentage of sperm with forward motility. The proportion of sperm with head and tail  
110 anomalies was quantified for each ejaculate with scores ranging from 0 to 3 (0: no or very  
111 few anomalies, 1: less than 10% sperm with anomalies, 2: between 10 and 30% sperm with  
112 anomalies, 3: more than 30% sperm with anomalies). We subsequently considered 35,785  
113 ejaculates that were collected from 1258 bulls at the age between 330 and 550 days to  
114 identify bulls from which all ejaculates were discarded due to insufficient semen quality.  
115 Ejaculates that contained less than 300 million sperm per ml, less than 70% motile sperm,  
116 more than 10% sperm with head and tail abnormalities, or whose volume was less than 1 ml  
117 were deemed to be unsuitable for artificial inseminations.

### 118 **Whole-genome sequencing and sequence variant genotyping**

119 We extracted DNA from hair roots of a Brown Swiss bull (sequence read archive accession:  
120 SAMEA6272098) that produced ejaculates with low sperm count and immotile sperm with  
121 multiple morphological abnormalities. For whole-genome sequencing, an Illumina TruSeq  
122 DNA PCR-free paired-end library with 400 bp insert size was sequenced at an Illumina  
123 NovaSeq6000 instrument. We used the fastp software [12] to remove adapter sequences,  
124 poly-G tails and reads that had phred-scaled quality less than 15 for more than 15% of the  
125 bases. Following quality control, we aligned 153,618,844 read pairs to the ARS-UCD1.2  
126 assembly of the bovine genome using the mem-algorithm of the BWA software [13] with  
127 option -M to mark shorter split hits as secondary alignments and default settings for all other

128 parameters. We marked duplicates using the Picard tools software suite  
129 (<https://github.com/broadinstitute/picard>). Alignments were sorted by coordinates using  
130 Sambamba [14]. Sequencing depth was calculated using the mosdepth software (version  
131 0.2.2, [15]) considering only reads with mapping quality >10.

132 Sequence variants (SNPs and indels) were genotyped for SAMEA6272098 together with 521  
133 cattle from various breeds (14 Hereford, 1 Nelore, 33 Grauvieh, 50 Fleckvieh, 2 Nordic Red  
134 Cattle, 47 Holstein, 243 Brown Swiss, 128 Original Braunvieh, 3 Wagyu) using a multi-  
135 sample variant discovery and genotyping approach implemented with the HaplotypeCaller,  
136 GenomicsDBImport and GenotypeGVCFs modules from the Genome Analysis Toolkit  
137 (GATK, [16]). Subsequently, we applied best practice guidelines of the GATK for variant  
138 filtration and imputed missing genotypes using Beagle [17]. The reference-guided variant  
139 genotyping workflow applied here is described in detail in Crysanto et al. [18]. Functional  
140 consequences of 41,659,308 autosomal variants were predicted according to the Ensembl  
141 (version 104) and Refseq (version 106) annotations of the bovine genome using the Variant  
142 Effect Predictor software [19] from Ensembl along with the SpliceRegion.pm plugin  
143 ([https://github.com/Ensembl/VEP\\_plugins/blob/release/101/SpliceRegion.pm](https://github.com/Ensembl/VEP_plugins/blob/release/101/SpliceRegion.pm)).

#### 144 **Identification of candidate causal variants**

145 We considered 397 sequenced fertile bulls as controls to identify sequence variant genotypes  
146 associated with the sperm disorder of SAMEA6272098 (**Additional file 1 File S1**).  
147 Assuming recessive inheritance of a deleterious allele, we screened the sequence variant  
148 genotypes of SAMEA6272098 for homozygous sites that were never found in homozygous  
149 state in fertile bulls. These variants were subsequently filtered to retain those with a predicted  
150 deleterious impact on a protein.

#### 151 **Identification of haplotype carriers in the population**

152 Sequence variant and partially imputed Illumina BovineHD genotypes, respectively, of 285  
153 and 33,045 cattle were used to assign the 1-bp deletion onto a haplotype. Briefly, 33,045  
154 cattle were genotyped using different Illumina SNP microarrays [4]. Following quality  
155 control, the genotypes were imputed to a density of 683,903 SNPs with Beagle [20] using a  
156 reference panel of 1166 cattle that had BovineHD genotypes. We retained 25,243 Brown  
157 Swiss and 5,228 Original Braunvieh animals from the Swiss populations.

158 We inspected the phased (and partially imputed) BovineHD genotypes of 285 animals which  
159 also had genotypes for the 1-bp deletion called from whole-genome sequencing data.  
160 Specifically, we searched for a haplotype extending BTA19:55436705 on either side that was  
161 shared in the heterozygous state in all sequenced 1-bp deletion carriers. The genotypes and  
162 haplotypes of the 285 animals are given in **Additional file 1 File S1**. We used the alleles of  
163 the longest shared haplotype to identify heterozygous and homozygous haplotype carriers  
164 among 30,471 genotyped Brown Swiss and Original Braunvieh cattle. Alleles and positions  
165 of markers encompassed by the haplotype (**Additional file 2 File S2**) were also provided to  
166 Brown Swiss breeding associations and genetic evaluation centres to screen their genomic  
167 prediction reference populations and selection candidates for homozygous haplotype carriers.

## 168 **Whole transcriptome sequencing and read alignment**

169 We used DNA and RNA sequencing data from a previously established expression QTL  
170 (eQTL) cohort to investigate transcript abundance and functional consequences arising from  
171 the 1-bp deletion. The eQTL cohort consisted of 76 mature bulls from which testes were  
172 sampled at a commercial slaughterhouse after regular slaughter. Total RNA and DNA was  
173 extracted from testis tissue and prepared for sequencing as described earlier [21].

174 DNA samples were sequenced on an Illumina NovaSeq6000 sequencer using 150 bp paired-  
175 end libraries. Quality control (removal of adapter sequences and bases with low quality, and  
176 trimming of poly-G tails) of the raw sequencing data was carried out using the fastp software  
177 [12] with default parameters. Following quality control, between 70,493,763 and  
178 307,416,205 read pairs per sample were aligned to the ARS-UCD1.2 version of the bovine  
179 reference genome [22] using the mem-algorithm of the BWA software (see above). Average  
180 coverage of the 76 DNA samples estimated using the mosdepth software (see above) ranged  
181 from 6.3 to 27.6 with a mean value of  $12.6 \pm 4.2$ . Sequence variant genotypes were called  
182 and filtered using the HaplotypeCaller, GenomicsDBImport, GenotypeGVCFs and  
183 VariantFiltration modules from the GATK as described above.

184 Total RNA sequencing libraries (2x150 bp) were prepared using the Illumina TruSeq  
185 Stranded Total RNA sequencing kit and sequenced on an Illumina NovaSeq6000 sequencer.  
186 Quality control (removal of adapter sequences and bases with low quality, and trimming of  
187 poly-A and poly-G tails) of the raw sequencing data was carried out using the fastp software  
188 [12]. Following quality control, between 191,160,837 and 386,773,085 filtered reads per

189 sample (mean: 283,587,831  $\pm$  43,284,185) were aligned to the ARS-UCD1.2 reference  
190 sequence and the Ensembl gene annotation (release 104) using STAR (version 2.7.9a) [23]  
191 with options --twopassMode Basic, --sjdbOverhang 100, --outFilterMismatchNmax 3, and --  
192 outSAMmapqUnique 60.

### 193 **Bioinformatic analysis**

194 The structure of bovine *QRICH2* (ENSBTAG00000030173, Gene-ID 530282) was analysed  
195 using data from Ensembl (version 104) and Refseq (version 106). Transcript abundance (in  
196 transcripts per million, TPM) was quantified using kallisto [24] and aggregated to the gene  
197 level using the R package tximport [25]. Exon abundance was quantified using QTLtools  
198 [26]. Exon-exon junctions were visualized using the ggsashimi R package [27]. Read  
199 coverage as well as reference and alternative allele support at the 1-bp deletion were  
200 inspected using the Integrative Genomics Viewer (IGV, [28]).

### 201 **Genotyping of the 1-bp deletion**

202 Polymerase chain reaction (PCR) and Sanger sequencing were used to validate the 1-bp  
203 deletion. PCR products from genomic DNA were amplified using the following primers: 5'-  
204 CATCGAGAAGGTGCAGATCC-3' (forward) and 5'-CTGCCC ACCGTTTGTAGC-3'  
205 (reverse) with a standard 50  $\mu$ L PCR reaction mix (100 ng genomic DNA and final  
206 concentrations of 1X PCR reaction buffer, 200  $\mu$ M dNTPs mixture, 0.2  $\mu$ M each primer and  
207 0.05 units/ $\mu$ L JumpStart Taq Polymerase (Sigma)). PCR amplification program consisted of  
208 the initial denaturation step at 94°C for 30s followed by 30 cycles of 94°C for 10s, 55°C for 1  
209 min, and 72°C for 30s with a final extension step at 72°C for 1 min. All PCR products were  
210 purified with GenElute PCR Clean-Up Kit (Sigma) and sent for Sanger sequencing  
211 (Microsynth, Switzerland). Sequencing results were analysed using CLC Genomics  
212 Workbench software (Qiagen).

### 213 **Semen analyses in a bull homozygous for the 1-bp deletion**

214 Ejaculates from a bull homozygous for the 1-bp deletion were collected at 14, 16, 17 and 20  
215 months of age using an artificial vagina. Sperm concentration, total sperm count, and sperm  
216 motility were determined with an IVOS II CASA system (Hamilton Thorne Inc., Beverly,  
217 U.S.A.) using Leja 2-chamber slides (Leja, Nieuw-Vennep, the Netherlands). Semen was

218 fixed in buffered formol saline solution (Na<sub>2</sub>HPO<sub>4</sub> 4.93g, KH<sub>2</sub>PO<sub>4</sub> 2.54g, 38%  
219 formaldehyde 125ml, NaCl 5.41g, distilled water q.s. 1000ml) and smears were prepared  
220 according to Hancock [29] for morphological examination. At least 200 spermatozoa were  
221 subsequently evaluated by phase contrast microscopy using oil immersion (Olympus BX50,  
222 UplanF1 100×/1.30, Olympus, Wallisellen, Switzerland). Morphologically abnormal sperm  
223 were assigned to defect categories according to Blom [30].

224 Sperm viability was assessed using the eosin-nigrosin staining method [31]. At least 200  
225 spermatozoa were evaluated in stained slides under oil immersion using a light microscope  
226 (Olympus BX50, UplanF1 100×/1.30, Olympus, Wallisellen).

227 The bull was slaughtered at 21 months at a regular slaughterhouse. Testis tissue was  
228 preserved in formalin, embedded in paraffin and subsequently stained with hematoxylin-  
229 eosin for histological evaluation.

### 230 **Transmission electron microscopy**

231 Sperm were prepared for transmission electron microscopy (TEM) from fresh semen diluted  
232 in OptiXcell (IMV technologies, L'Aigle, France) and stored at 5°C overnight. Semen  
233 samples were washed twice by dilution in phosphate buffered saline (PBS) and subsequent  
234 centrifugation at 300g for 10 minutes. After removing the supernatant, the pellet was fixed  
235 with equal volume of 6% glutaraldehyde in PBS, resuspended gently, and centrifuged at  
236 6000g. After removing the supernatant, the sperm were fixed for a second time with 3%  
237 glutaraldehyde in PBS, and finally pelleted at 6000g. Pellets were washed three times in PBS,  
238 post-fixed in 1% osmium tetroxide, washed in double distilled water, stained in 1% uranyl  
239 acetate, dehydrated in graded series of ethanol (25, 50, 75, 90, and 100%), and embedded in  
240 epoxy resin through increasing concentrations (25, 50, 75, and 100%) using PELCO  
241 Biowave+ tissue processor (Ted Pella, USA), and then cured at 60°C for three days.  
242 Embedded blocks were sectioned using Leica FC6 microtome and a DIATOME diamond  
243 knife with 45° angle into 60nm sections and mounted on Quantifoil copper grids with  
244 formvar carbon films. Sections were post-stained with 2% uranyl acetate followed by lead  
245 citrate. Grids were imaged using FEI Morgagni 268 electron microscope operated at 100kV  
246 at 8.9 to 56k magnification.

247



## 248 **Scanning electron microscopy**

249 Sperm were prepared for scanning electron microscopy (SEM) within 30 minutes after semen  
250 collection. A thin layer of native semen was spread on carbon coated coverslips with the side  
251 of a pipet tip. The coverslips were immersed in 3% glutaraldehyde in PBS solution and kept  
252 on ice. After fixation overnight at 4°C, fresh fixative was added and the sample was put in a  
253 PELCO BioWave, Pro+ microwave system (Ted Pella, USA). Following the microwave-  
254 assisted fixation and dehydration procedure, another fixation on ice was performed. After  
255 washing in PBS, samples were postfixed in 1% OsO<sub>4</sub> in double distilled water, washed again  
256 and dehydrated in a graded series of ethanol (50, 75, 90, 98, and three times 100%) on ice  
257 followed by critical point drying out of dry ethanol (CPD 931, Tousimis, USA). The resulting  
258 samples were mounted on SEM aluminium stubs, fixed on conductive carbon tape and then  
259 sputter-coated with 4nm of platinum/palladium (CCU-10, Safematic, CH). Acquisition of  
260 images was performed using In-lens and Everhart-Thornley secondary electron (SE) signals  
261 at a working distance of 4mm with a scanning electron microscope (Merlin FE-SEM, Zeiss,  
262 DE), operated at an accelerating voltage of 1.5kV.

263

## 264 **Results**

### 265 **Identification of a Brown Swiss bull with poor semen quality**

266 We examined historic semen quality records from a semen collection centre in Switzerland as  
267 part of our ongoing efforts to investigate inherited variation in male reproduction in Brown  
268 Swiss bulls [1],[4],[32]. Among 1343 Brown Swiss bulls that produced 70,990 ejaculates, we  
269 identified seven bulls from which all ejaculates (between 5 and 28 per bull) were rejected due  
270 to immotile (asthenozoospermia), morphologically abnormal (teratozoospermia), or absent  
271 (azoospermia) sperm, or a combination thereof. We subsequently focus on one of these bulls  
272 (born in 2003) from which preserved hair roots provided a source of DNA for genetic  
273 investigations.

274 Twelve ejaculates from this bull were collected between 15 and 18 months of age. The  
275 ejaculates had higher volumes (6.6±1.5 vs. 4.7±2.0 ml) and lower sperm concentration  
276 (0.2±0.2 vs. 1.3±0.5 x 10<sup>9</sup> sperm cells per ml) than observed in other Brown Swiss bulls of

277 the same age. Almost all (99%) sperm were immotile and had head and tail abnormalities.  
278 The proportion of viable sperm was not recorded. Such findings are commonly referred to as  
279 oligoasthenoteratozoospermia.

## 280 **Candidate causal variants**

281 The genome of the bull that produced ejaculates of insufficient quality (sequencing read  
282 archive accession: SAMEA6272098) was sequenced to 11.8-fold coverage using paired-end  
283 libraries. Sequence variant genotypes from SAMEA6272098 were compared to those of 397  
284 fertile artificial insemination bulls from various breeds that had average sequencing coverage  
285 of  $10.0 \pm 5.7$  fold (between 3.1- and 56.8-fold).

286 We hypothesized that the drastically reduced semen quality of SAMEA6272098 was due to a  
287 recessively inherited deleterious allele. From a catalogue of 41,659,308 autosomal sequence  
288 variants, we retained 1655 that were homozygous in SAMEA6272098 but not seen in the  
289 homozygous state in the fertile control bulls (**Additional file 4 File S4**). Only three  
290 compatible variants were predicted to be deleterious to protein function: a nonsense variant in  
291 *MLNR* encoding motilin receptor, a frameshift variant in *QRICH2* encoding glutamine rich 2,  
292 and a nonsense variant in *ENSBTAG00000023270* encoding an uncharacterized protein  
293 (**Table 1**). Another nine (Ensembl) and ten (Refseq) compatible variants were predicted to  
294 have moderate impacts on the respective proteins.

295 In testis transcriptomes from 76 mature bulls, *MLNR* and *ENSBTAG00000023270* were  
296 expressed with less than 0.1 transcripts per million (TPM). However, *QRICH2* was  
297 transcribed in high abundance (31.43 TPM). Moreover, *QRICH2* shows an extremely testis-  
298 biased expression in mammals (e.g., <https://gtexportal.org/home/>,  
299 <http://cattlegeneatlas.roslin.ed.ac.uk/>) [33]. Pathogenic alleles in human and mouse *QRICH2*  
300 cause sperm with multiple morphological abnormalities of the flagella [34],[35],[36]. Thus,  
301 we considered *QRICH2* as a compelling functional candidate gene for the sperm defect of  
302 SAMEA6272098.

303

304

305

306 **Table 1: High impact variants compatible with recessive inheritance**

| Chr | Pos      | Ref | Alt | Gene                      | Transcript abundance in testis tissue (TPM) | Impact on protein | ensembl / refseq / both |
|-----|----------|-----|-----|---------------------------|---------------------------------------------|-------------------|-------------------------|
| 12  | 18859636 | C   | A   | <i>MLNR</i>               | 0.07 ± 0.04                                 | Cys587Ter         | Both                    |
| 19  | 55436705 | TC  | T   | <i>QRICH2</i>             | 31.43 ± 7.35                                | Cys1644AlafsTer52 | Both                    |
| 24  | 10181719 | G   | A   | <i>ENSBTAG00000023270</i> | 0.04 ± 0.03                                 | Trp248Ter         | Ensembl                 |

307

308 **A 1-bp deletion in the coding sequence of *QRICH2* is associated with aberrant**  
309 **semen quality**

310 The candidate causal variant underpinning the sperm defect is a 1-bp deletion in the sixteenth  
311 exon of *QRICH2* (BTA19:55436705TC>T, ENSBTAT00000018337.1:c.4929del). The  
312 deletion of a cytosine residue is predicted to alter the reading frame from amino acid 1644  
313 onwards eventually inducing a premature termination codon  
314 (ENSBTAP00000018337.1:p.Cys1644AlafsTer52). This leads to a truncated protein that  
315 lacks 131 amino acids (7%) from the C-terminal region unless the transcript is subjected to  
316 nonsense-mediated mRNA decay.

317 The 1-bp deletion resides within an approximately 3.625 Mb segment (between 55 and  
318 58.625 Mb) of very low heterozygosity (**Figure 1**). This pattern suggests homozygosity for a  
319 haplotype encompassing the 1-bp deletion that SAMEA6272098 inherited from an ancestor  
320 that is present in both its maternal and paternal ancestry. The pedigree-derived coefficient of  
321 inbreeding of SAMEA6272098 is 7.61%.

322 Among 244 and 124 sequenced Brown Swiss and Original Braunvieh cattle, respectively, we  
323 detected the 1-bp deletion in the heterozygous state in 25 and 3 individuals, corresponding to  
324 an allele frequency of 5.1% and 1.2%. The heterozygous Original Braunvieh bulls were from  
325 Germany for which we cannot rule out that the variant was recently introgressed through  
326 cross-breeding with Brown Swiss ancestors. The mutation did not segregate among 110  
327 sequenced Original Braunvieh cattle from the Swiss herdbook population. We did not detect  
328 the mutation in breeds other than Brown Swiss and Original Braunvieh.

329 In a catalogue of variants that was established by the 1000 Bull Genomes Project consortium  
330 for 3934 cattle from various breeds, the 1-bp deletion was discovered in 16 animals from the  
331 Brown Swiss and one animal from the Nordic Red Dairy Cattle breeds. The carrier animal  
332 from the Nordic Red Dairy Cattle breed had an estimated proportion of 34% Brown Swiss  
333 ancestry. In the 1000 Bull Genomes dataset, only SAMEA6272098 carried the deletion in the  
334 homozygous state.

335 *QRICH2* mRNA was less abundant in six heterozygous carriers of the frameshift variant than  
336 70 bulls that were homozygous for the wild-type allele ( $23.29 \pm 6.76$  vs.  $32.13 \pm 7.01$  TPM).  
337 Differential expression between heterozygous and wild-type bulls was evident for all  
338 *QRICH2* exons (**Additional file 5 File S5**). We observed allelic imbalance at the 1-bp  
339 deletion in the total RNA sequencing alignments of all six heterozygous bulls; an average of  
340  $292 \pm 143$  sequencing reads overlapped with the position of BTA19:55436705TC>T, but less  
341 than a third ( $81 \pm 32$ ) supported the deletion (**Additional file 5 File S5**), indicating that the  
342 RNA is depleted for the transcript carrying the deletion.

### 343 **Identification of homozygous haplotype carriers in the Brown Swiss** 344 **population**

345 To validate the suspected sperm defect arising from the 1-bp deletion, we sought to examine  
346 ejaculates from homozygous bulls. Because SAMEA6272098 had been slaughtered in 2005  
347 and semen samples had not been preserved, it was not possible to re-examine its sperm  
348 defect. In order to identify homozygous mutation carriers, we employed a dataset that  
349 contained 25,243 Brown Swiss and 5,228 Original Braunvieh cattle with phased Illumina  
350 BovineHD Bead chip genotypes at 17,579 SNPs located on bovine chromosome 19. These  
351 animals were genotyped for routine genomic breeding value prediction in Switzerland.

352 Of the 30,471 genotyped Brown Swiss and Original Braunvieh cattle, 285 (28 females, 257  
353 males) also had whole-genome sequence-called genotypes at the BTA19:55436705TC>T  
354 variant. Twenty-one sequenced animals (1 female, 20 males) were heterozygous carriers of  
355 the 1-bp deletion. Under the assumption that these 21 animals inherited the 1-bp deletion  
356 from a common ancestor, we screened their phased array-derived genotypes for a shared  
357 haplotype encompassing BTA19:55436705TC>T. This approach identified a 675 kb  
358 haplotype encompassing 181 Illumina BovineHD BeadChip SNPs and spanning from

359 54,992,461 to 55,667,539 bp on BTA19 that all 21 heterozygous animals carried in the  
360 heterozygous state (**Figure 1, Additional file 2 File S2**).

361 Of the 264 sequenced animals that did not carry the 1-bp deletion, only one animal  
362 (SAMEA7573647) carried the haplotype in the heterozygous state. This animal was a fertile  
363 paternal half-sib of SAMEA6272098. Upon manual inspection of the read alignments, we  
364 noticed that only one properly mapped sequencing read overlapped with  
365 BTA19:55436705TC>T in that bull (**Additional file 6 File S6**). This read supported the 1-bp  
366 deletion, despite the bull being genotyped as homozygous for the reference cytosine residue.  
367 Low sequencing coverage likely resulted in the undercalling of heterozygous genotypes.  
368 Thus, the microarray-derived haplotype was in full concordance with the genotypes at the  
369 BTA19:55436705 TC>T variant in the 285 sequenced animals.

370 The 675 kb haplotype had a frequency of 5.4% among 25,243 genotyped Brown Swiss cattle.  
371 Haplotype frequency didn't change notably over the past 30 years. We detected 2712  
372 heterozygous and 54 and homozygous haplotype carriers. Since 79 homozygous animals  
373 were expected assuming random mating, the observed haplotype distribution deviates slightly  
374 from Hardy-Weinberg proportions ( $P=0.03$ ). The maternal grandsire from the heterozygous  
375 bull from the Nordic Red Dairy Cattle breed carried the haplotype in the heterozygous state.  
376 Of the homozygous haplotype carriers, 35 were females and 19 were males. None of the  
377 homozygous bulls had been selected as an artificial insemination sire. Thus, their semen  
378 quality was not examined. Of the 35 homozygous females, 33 gave birth to at least one  
379 offspring, indicating that their fertility was not compromised. Inspection of uncorrected milk  
380 records in heterozygous cows indicated that their milk production is normal. None of the  
381 5,228 Original Braunvieh cattle carried the 675 kb haplotype.

382 We used semen quality data from 1133 Brown Swiss bulls that were previously analyzed by  
383 Hiltbold et al. ([1],[4]) to investigate if the haplotype is associated with semen quality in the  
384 heterozygous state. We examined an average number of 55 (between 5 and 242) and 58  
385 (between 2 and 573) ejaculates, respectively, from 143 heterozygous haplotype carriers and  
386 990 bulls that did not carry the haplotype. Average ejaculate volume (in ml), sperm  
387 concentration (million sperm per ml), and percentage of motile sperm was 4.68, 1263, and 85  
388 in heterozygous haplotype carriers and 5.02, 1218, and 84 in non-carriers, respectively. The  
389 proportion of ejaculates that were rejected or contained an excess of sperm with head and tail

390 anomalies did not differ notably between heterozygous carriers and non-carriers, supporting a  
391 recessive mode of inheritance.

392 All male homozygous haplotype carriers had been slaughtered before our study was  
393 conducted, preventing ejaculate collection and semen analyses. In order to identify  
394 homozygous bulls for phenotypic investigations, we provided the coordinates of the 675 kb  
395 haplotype to the Brown Swiss genetic evaluation centres in Switzerland, Austria and  
396 Germany. A haplotype screen in the genomic selection reference populations identified a six-  
397 month-old bull born in 2020 that carried the haplotype in the homozygous state. The sire of  
398 SAMEA6272098 was in the maternal (6<sup>th</sup> ancestral generation) and paternal (5<sup>th</sup> ancestral  
399 generation) ancestry of the six-month-old homozygous haplotype carrier indicating  
400 inbreeding due to an obligate carrier of the 1-bp deletion (**Figure 1a**). Sanger sequencing  
401 confirmed homozygosity for the 1-bp deletion (BTA19:55436705TC>T). The bull appeared  
402 regularly developed and healthy.

#### 403 **Ejaculates of a homozygous bull contain immotile sperm with multiple** 404 **morphological abnormalities**

405 We kept this bull at a research station together with other bulls of similar age. At 14 months,  
406 scrotal circumference was relatively small (31 cm) possibly indicating delayed puberty. The  
407 first ejaculate collected from the bull had a volume of 5 ml, but it contained only  $0.03 \times 10^9$   
408 sperm per ml (**Table 2**). None of the sperm were motile and 97.3% had tail or head  
409 abnormalities. Scrotal circumference increased with age (34.5 cm at 20 months) but remained  
410 relatively small compared to other bulls. We collected six additional ejaculates from the bull  
411 at 16, 17, and 20 months. The ejaculates had an average volume of  $4.0 \pm 0.9$  ml and contained  
412  $0.2 \pm 0.1 \times 10^9$  sperm per ml, confirming normal volume but aberrantly low sperm  
413 concentration and sperm count. More than 99% of the sperm had major defects and less than  
414 1% were motile. Histological examination of the testis after slaughter indicated that Leydig  
415 cells, rete testis, and tubuli seminiferi were formed normally and spermatogenesis was  
416 detectable.

417 Microscopic semen analysis revealed multiple morphological abnormalities in almost all  
418 sperm primarily affecting the flagella (**Figure 2, Additional file 7 File S7**). Morphological  
419 abnormalities included shortened, coiled, bent, looped, thickened, doubled and absent tails.  
420 Loose tails were not detected. Approximately 20% of the examined sperm were either

421 underdeveloped, had irregularly shaped heads or nuclear vacuoles. Eosin-nigrosin staining  
422 indicated that between 4 and 12% of the sperm were viable despite morphological  
423 abnormalities of the head and flagella (**Figure 2c**).

424 Transmission electron microscopy cross-sections of sperm from the affected bull confirmed  
425 multiple ultrastructural defects of the flagellum and head (**Figure 3, Additional file 8 File**  
426 **S8**). The axonemes of most flagella deviated from the typical assembly of nine outer  
427 microtubule doublets surrounding the central pair. A variable number of outer microtubule  
428 doublets was missing in the principal and end piece region of most examined flagella. We  
429 also detected sperm with multiple flagellar structures within the same cell membrane,  
430 indicating that the flagellum was folded around the head instead of being elongated which is  
431 typical for underdeveloped sperm (**Additional file 8 File S8**). Occasionally, we found  
432 axonemes in cross-sections of the principal piece that appeared regularly organized.

433

434 **Table 2: Semen analysis in a bull homozygous for the 1-bp deletion in the coding**  
435 **sequence of *QRICH2***

| Age of the bull (months) | Scrotal circumference (cm) | Ejaculate volume (ml) | Sperm concentration ( $10^9$ sperm per ml) | Sperm with major defects (%) | Motile sperm (%) | Viable sperm (%) |
|--------------------------|----------------------------|-----------------------|--------------------------------------------|------------------------------|------------------|------------------|
| 14                       | 31                         | 5.0                   | 0.031                                      | 97.3                         | 0                | na               |
| 16                       | 32.5                       | 4.0                   | 0.187                                      | 99.6                         | <1               | na               |
|                          |                            | 5.0                   | 0.115                                      | 97.9                         | <1               | na               |
| 17                       | 33.5                       | 2.8                   | 0.160                                      | 100                          | 0                | 12               |
|                          |                            | 3.0                   | 0.088                                      | 98.7                         | <1               | 10.8             |
| 20                       | 34.5                       | 4.5                   | 0.214                                      | 99.2                         | 0                | 4.2              |
|                          |                            | 4.5                   | 0.360                                      | 99.3                         | <1               | 10.4             |

436

437

438

## 439 Discussion

440 We detect a recessive, frameshift-inducing, 1-bp deletion in *QRICH2* in two Brown Swiss  
441 bulls producing ejaculates with low sperm concentration and immotile sperm with multiple  
442 morphological abnormalities. Semen samples from the bulls were not used for artificial  
443 inseminations because this disorder very likely prevents fertilization *in vivo* due to the  
444 inability of the sperm to move. Intracytoplasmic sperm injection (ICSI) – albeit not a  
445 common practice in cattle breeding – could possibly enable fertilization because some sperm  
446 were viable and had normally shaped heads. In fact, ICSI enabled fertilization using sperm  
447 with multiple morphological abnormalities of the flagella due to deleterious variants in  
448 *QRICH2* and normal offspring development in humans [36].

449 We applied an indirect haplotype test to estimate that the 1-bp deletion segregates at a  
450 frequency of 5% in the Brown Swiss population. Assuming random mating, the deletion is  
451 expected to occur in the homozygous state in 1 out of 400 bulls. However, the proportion of  
452 homozygous bulls was lower in our study. None of 1133 Brown Swiss bulls for which we  
453 had microarray-derived genotypes and routinely assessed semen quality phenotypes, carried  
454 the haplotype in the homozygous state. The 1-bp deletion resides on a haplotype that is  
455 inherited from a common ancestor. The mating of closely related individuals is generally  
456 avoided to prevent inbreeding, and therefore haplotypes may occur less frequent in the  
457 homozygous state than expected under random mating. In principle, the frequency of the 1-bp  
458 deletion may be lower than estimated from an indirect haplotype test. If a mutation occurred  
459 relatively recently, the haplotype encompassing the mutation may be indistinguishable from  
460 its ancestral form that does not carry the mutation. In such a situation, a haplotype-based test  
461 overestimates the frequency of the mutation [37]. However, we didn't find evidence that an  
462 ancestral version of the haplotype segregates in the Brown Swiss population, as the 675 kb  
463 haplotype was in full concordance with the 1-bp deletion. Moreover, the haplotype frequency  
464 agreed well with the frequency of the 1-bp deletion estimated from whole-genome sequence  
465 variants.

466 The birth years of the two homozygous bulls span almost two decades. Only one of them was  
467 selected as a potential artificial insemination sire. Since immotile sperm with multiple  
468 morphological abnormalities became apparent during routine semen analyses, all ejaculates  
469 from this bull were discarded and not used for artificial inseminations. Heterozygous bulls



470 produce normal sperm. If the semen of prospective artificial insemination and natural mating  
471 bulls is examined, this sperm defect can be recognized easily and won't manifest in repeated  
472 breedings and low non-return rates as it is the case for infertility disorders that are not  
473 apparent from standard semen analyses [8]. Economic losses due to this defect are negligible  
474 in the Brown Swiss cattle population because the frequency of the 1-bp deletion is low and  
475 aberrant semen quality of homozygous bulls can be detected easily.

476 The widespread use of individual mutation carriers in artificial insemination can result in the  
477 frequent manifestation of recessive alleles within short time [38]. It is advised to monitor the  
478 BTA19:55436705TC>T variant in the Brown Swiss population, e.g., using customized  
479 microarrays, and implement genome-based mating programs to avoid the frequent emergence  
480 of bulls that produce ejaculates containing immotile sperm. We did not detect the  
481 BTA19:55436705TC>T variant in Swiss Original Braunvieh animals suggesting that the  
482 mutation occurred relatively recently possibly after the bifurcation of the Braunvieh breed  
483 into a dairy (Brown Swiss) and dual-purpose (Original Braunvieh) lineage. We found the 1-  
484 bp deletion in one animal from the Nordic Red Dairy Cattle breed likely resulting from  
485 crossbreeding with a heterozygous Brown Swiss sire [39]. Thus, our study adds to an  
486 increasing number of alleles with undesired effects that had been introgressed from foreign  
487 breeds into the Nordic Red Dairy Cattle breed [40],[41],[42].

488 Human and mouse orthologs of *QRICH2* harbour loss-of-function variants that result in  
489 multiple morphological abnormalities and ultrastructural defects of the sperm flagella,  
490 thereby leading to immotile sperm and infertility *in vivo* [34],[35],[43]. We replicate these  
491 findings in ejaculates from two bulls homozygous for a frameshift-inducing 1-bp deletion in  
492 bovine *QRICH2* suggesting evolutionarily conserved protein function. The 1-bp deletion is  
493 predicted to induce a premature termination codon that shortens the protein by 131 amino  
494 acids. The truncated protein may be retained with reduced functionality or the transcript may  
495 be degraded via nonsense-mediated mRNA decay. The position of the premature termination  
496 codon complies with both canonical and non-canonical rules for nonsense-mediated mRNA  
497 decay [44],[45],[46]. Allelic imbalance at the 1-bp deletion and lower levels of *QRICH2*  
498 mRNA in testis transcriptomes of heterozygous than wild-type bulls confirms that the  
499 premature termination codon triggers nonsense-mediated mRNA decay. These findings show  
500 that the 1-bp deletion constitutes a loss-of-function allele of bovine *QRICH2*, thereby

501 supporting the pathogenicity of a predicted deleterious variant residing in a similar domain of  
502 human *QRICH2* [35].

503 So far, *QRICH2* has primarily been implied in sperm flagellar formation. Apart from flagellar  
504 abnormalities, we noticed sperm head anomalies, drastically reduced sperm concentration  
505 and low sperm count in all ejaculates examined from bulls homozygous for the 1-bp deletion.  
506 Sperm concentration and total sperm count were also at the lower bound of the normal range  
507 in humans with deleterious *QRICH2* alleles [34],[35],[43]. These findings suggest that loss of  
508 *QRICH2* functionality not only compromises the assembly of sperm flagella, but generally  
509 impairs spermiogenesis. Variants other than the 1-bp deletion may contribute to the aberrant  
510 semen quality of the two examined Brown Swiss bulls. However, pinpointing putative  
511 modifier loci is difficult for rare alleles [47] and was not attempted for the 1-bp deletion in  
512 *QRICH2*.

513 To the best of our knowledge, this is the first time that consequences arising from a loss-of-  
514 function allele in *QRICH2* are described in a species other than mice and human. Apart from  
515 producing anomalous ejaculates, homozygous bulls are indistinguishable from wild-type and  
516 heterozygous individuals. Homozygous cows were not examined clinically in our study, but  
517 their undisturbed fertility and normal milk production likely indicate an overall normal health  
518 [48]. Moreover, no QTL for economically relevant traits have been detected next to  
519 BTA19:55436705TC>T in Brown Swiss cattle [49]. These findings suggest that the 1-bp  
520 deletion does not compromise traits other than semen quality. This agrees with loss-of-  
521 function alleles in other genes with extreme testis-biased expression [8],[9],[10],[50], and  
522 corroborates findings in humans and mice with loss-of-function alleles in *QRICH2* [34]  
523 suggesting that *QRICH2* is dispensable for somatic development in mammals. The deviation  
524 of the haplotype encompassing the 1-bp deletion from Hardy-Weinberg proportions ( $P=0.03$ )  
525 is likely due to either selective breeding or the inability of homozygous males to contribute to  
526 the next generation rather than fatal consequences arising from homozygosity.

527 Our analyses in two homozygous bulls provide evidence for the causality of the 1-bp deletion  
528 from a statistical, functional, and comparative genomics point of view [51],[52]. We  
529 discovered the deletion using a phenotype-driven approach in a historic sample and verified  
530 its phenotypic consequences in a second bull born almost two decades later that we found  
531 through a genotype-driven screen. Transcriptome analyses show that the 1-bp deletion  
532 triggers nonsense-mediated mRNA decay, corroborating it constitutes a loss-of-function

533 allele. Orthologs of bovine *QRICH2* harbour loss-of-function alleles, some of them residing  
534 in the same domain as the 1-bp deletion identified in our study, that cause sperm defects  
535 mirroring those of the homozygous Brown Swiss bulls, suggesting *QRICH2* is essential for  
536 male fertility in mammals. While a formal proof for the causality remains to be produced,  
537 these pieces of evidence are sufficient to warrant monitoring of the 1-bp deletion in cattle  
538 breeding programs.

539

## 540 **Conclusions**

541 A 1-bp deletion in the coding sequence of bovine *QRICH2* is likely causal for low sperm  
542 concentration and immotile sperm with multiple morphological abnormalities in the  
543 homozygous state. The 1-bp deletion has a frequency of 5% in the Brown Swiss cattle  
544 population. Homozygous bulls are unsuitable for breeding as they are very likely infertile *in*  
545 *vivo*. Apart from poor semen quality, homozygous bulls are indistinguishable from  
546 heterozygous and wild-type animals. Immediate economic consequences arising from the  
547 undesired allele are negligible. The monitoring of the defective allele in the Brown Swiss  
548 cattle population using customized genotyping is advised to avoid an increase in allele  
549 frequency.

550

551

## 552 **Declarations**

### 553 **Ethics approval and consent to participate**

554 Our study was approved by the veterinary office of the Canton of Zurich, Switzerland  
555 (animal experimentation permit ZH 181/19).

### 556 **Consent for publication**

557 Not applicable

### 558 **Availability of data**

559 Whole-genome sequencing data of 397 fertile bulls and the infertile bull are available at the  
560 European Nucleotide Archive (ENA) of the EMBL under sample accessions listed in  
561 **Additional file 1 File S1**. Whole-genome sequencing data of 285 cattle used to identify a  
562 trait-associated haplotype are available at the European Nucleotide Archive (ENA) of the  
563 EMBL under sample accessions listed in **Additional file 1 File S1**. DNA and RNA  
564 sequencing data of 76 bulls of the eQTL cohort are available at the European Nucleotide  
565 Archive (ENA) of the EMBL under sample accessions listed in **Additional file 3 File S3**.

### 566 **Competing interests**

567 Ulrich Witschi is an employee of Swissgenetics.

### 568 **Funding**

569 This study received financial support from Swissgenetics, Zollikofen, Switzerland  
570 (<https://swissgenetics.ch/>). The sequencing of Brown Swiss animals was supported by a grant  
571 from the Swiss National Science Foundation (310030 185229). The establishment of an  
572 eQTL cohort was supported by an ETH Zurich Research Grant.

573

574

## 575 **Author's contributions**

576 HP conceived the study. MH and HP analysed the data. MH and FJ analysed semen samples  
577 of the homozygous bull. NKK called sequence variant genotypes. XMM established the  
578 eQTL cohort. ZHF carried out sequencing experiments. HP, HS and FRS analysed  
579 genotyping data from the Brown Swiss reference populations. MS organised genetic material  
580 for sequencing. UW provided semen quality data. HP and MH wrote the manuscript. All  
581 authors read and approved the final manuscript.

582

## 583 **Acknowledgements**

584 We thank Dr. Franz Birkenmaier (Allgäuer Herdbuchgesellschaft) for support in identifying  
585 homozygous bulls as well as Dr. Melissa Terranova and Flavio Ferrari (AgroVet-Strickhof)  
586 for the handling of the bull. We thank Braunvieh Schweiz for providing genotype data. We  
587 are thankful for the excellent technical support provided by the ETH Zürich technology  
588 platform FGCZ (<https://fgcz.ch/>) concerning DNA and RNA sequencing. We are grateful to  
589 Dr. Cecilia Bebeacua and Stephan Handschin from the ETH Zürich technology platform  
590 ScopeM (<https://scopem.ethz.ch/>) for outstanding support in electron microscopy. We  
591 appreciate support from veterinarians from the meat inspection and the slaughterhouse staff  
592 in sampling of bull testes as well as Till Graf, Patrick Fitzi, and Remo Hengartner for their  
593 contribution to collect tissue.

594

595

## 596 **References**

- 597 1. Hiltbold M, Niu G, Kadri NK, Crysanto D, Fang Z-H, Spengeler M, et al. Activation of  
598 cryptic splicing in bovine WDR19 is associated with reduced semen quality and male  
599 fertility. *PLOS Genetics*. 2020;16:e1008804.
- 600 2. Schaeffer LR. Evaluation of Bulls for Nonreturn Rates Within Artificial Insemination  
601 Organizations. *Journal of Dairy Science*. 1993;76:837–42.
- 602 3. Taylor JF, Schnabel RD, Sutovsky P. Review: Genomics of bull fertility. *Animal*.  
603 2018;12:s172–83.
- 604 4. Hiltbold M, Kadri NK, Janett F, Witschi U, Schmitz-Hsu F, Pausch H. Autosomal  
605 recessive loci contribute significantly to quantitative variation of male fertility in a dairy  
606 cattle population. *BMC Genomics*. 2021;22:225.
- 607 5. Nani JP, Peñagaricano F. Whole-genome homozygosity mapping reveals candidate regions  
608 affecting bull fertility in US Holstein cattle. *BMC Genomics*. 2020;21:338.
- 609 6. Ferenčaković M, Sölkner J, Kapš M, Curik I. Genome-wide mapping and estimation of  
610 inbreeding depression of semen quality traits in a cattle population. *J Dairy Sci*.  
611 2017;100:4721–30.
- 612 7. Mathevon M, Buhr MM, Dekkers JC. Environmental, management, and genetic factors  
613 affecting semen production in Holstein bulls. *J Dairy Sci*. 1998;81:3321–30.
- 614 8. Pausch H, Kölle S, Wurmser C, Schwarzenbacher H, Emmerling R, Jansen S, et al. A  
615 Nonsense Mutation in TMEM95 Encoding a Nondescript Transmembrane Protein Causes  
616 Idiopathic Male Subfertility in Cattle. *PLOS Genetics*. 2014;10:e1004044.
- 617 9. Pausch H, Venhoranta H, Wurmser C, Hakala K, Iso-Touru T, Sironen A, et al. A  
618 frameshift mutation in ARMC3 is associated with a tail stump sperm defect in Swedish Red  
619 (*Bos taurus*) cattle. *BMC Genet*. 2016;17:49.
- 620 10. Iso-Touru T, Wurmser C, Venhoranta H, Hiltbold M, Savolainen T, Sironen A, et al. A  
621 splice donor variant in CCDC189 is associated with asthenospermia in Nordic Red dairy  
622 cattle. *BMC Genomics*. 2019;20:286.
- 623 11. Abdollahi-Arpanahi R, Pacheco HA, Peñagaricano F. Targeted sequencing reveals  
624 candidate causal variants for dairy bull subfertility. *Anim Genet*. 2021;52:509–13.
- 625 12. Chen S, Zhou Y, Chen Y, Gu J. Fastp: An ultra-fast all-in-one FASTQ preprocessor.  
626 *Bioinformatics*. 2018;34:i884–90.
- 627 13. Li H. Aligning sequence reads, clone sequences and assembly contigs with BWA-MEM,  
628 arXiv:13033997. 2013.
- 629 14. Tarasov A, Vilella AJ, Cuppen E, Nijman IJ, Prins P. Sambamba: Fast processing of NGS  
630 alignment formats. *Bioinformatics*. 2015;31:2032–4.

- 631 15. Pedersen BS, Quinlan AR. Mosdepth: Quick coverage calculation for genomes and  
632 exomes. *Bioinformatics*. 2018;34:867–8.
- 633 16. DePristo MA, Banks E, Poplin RE, Garimella KV, Maguire JR, Hartl C, et al. A  
634 framework for variation discovery and genotyping using next-generation DNA sequencing  
635 data. *Nat Genet*. 2011;43:491–8.
- 636 17. Browning BL, Browning SR. A Unified Approach to Genotype Imputation and  
637 Haplotype-Phase Inference for Large Data Sets of Trios and Unrelated Individuals. *Am J*  
638 *Hum Genet*. 2009;84:210–23.
- 639 18. Crysanto D, Wurmser C, Pausch H. Accurate sequence variant genotyping in cattle  
640 using variation-aware genome graphs. *Genetics Selection Evolution*. 2019;51:21.
- 641 19. McLaren W, Gil L, Hunt SE, Riat HS, Ritchie GRS, Thormann A, et al. The Ensembl  
642 Variant Effect Predictor. *Genome Biology*. 2016;17:122.
- 643 20. Browning BL, Browning SR. Genotype Imputation with Millions of Reference Samples.  
644 *Am J Hum Genet*. 2016;98:116–26.
- 645 21. Kadri NK, Mapel XM, Pausch H. The intronic branch point sequence is under strong  
646 evolutionary constraint in the bovine and human genome. *Commun Biol*. 2021;4:1–13.
- 647 22. Rosen BD, Bickhart DM, Schnabel RD, Koren S, Elvik CG, Tseng E, et al. De novo  
648 assembly of the cattle reference genome with single-molecule sequencing. *Gigascience*.  
649 2020;9. doi:10.1093/gigascience/giaa021.
- 650 23. Dobin A, Davis CA, Schlesinger F, Drenkow J, Zaleski C, Jha S, et al. STAR: ultrafast  
651 universal RNA-seq aligner. *Bioinformatics*. 2013;29:15–21.
- 652 24. Bray NL, Pimentel H, Melsted P, Pachter L. Near-optimal probabilistic RNA-seq  
653 quantification. *Nature Biotechnology*. 2016;34:525–7.
- 654 25. Sonesson C, Love MI, Robinson MD. Differential analyses for RNA-seq: transcript-level  
655 estimates improve gene-level inferences. *F1000Res*. 2015;4:1521.
- 656 26. Delaneau O, Ongen H, Brown AA, Fort A, Panousis NI, Dermitzakis ET. A complete  
657 tool set for molecular QTL discovery and analysis. *Nat Commun*. 2017;8:15452.
- 658 27. Garrido-Martín D, Palumbo E, Guigó R, Breschi A. ggsashimi: Sashimi plot revised for  
659 browser- and annotation-independent splicing visualization. *PLoS Comput Biol*.  
660 2018;14:e1006360.
- 661 28. Robinson JT, Thorvaldsdóttir H, Winckler W, Guttman M, Lander ES, Getz G, et al.  
662 Integrative Genomics Viewer. *Nat Biotechnol*. 2011;29:24–6.
- 663 29. Hancock JL. The morphology of boar spermatozoa. *J R Microsc Soc*. 1957;76:84–97.
- 664 30. Blom E. [The ultrastructure of some characteristic sperm defects and a proposal for a new  
665 classification of the bull spermogram (author's transl)]. *Nord Vet Med*. 1973;25:383–91.

- 666 31. Blom E. A one-minute live-dead sperm stain by means of eosin-nigrosin. *Fertility and*  
667 *Sterility*. 1950;1:176–7.
- 668 32. Mapel XM, Hiltbold M, Kadri NK, Witschi U, Pausch H. Bull fertility and semen quality  
669 are not correlated with dairy and production traits in Brown Swiss cattle. submitted. 2021.
- 670 33. Fang L, Cai W, Liu S, Canela-Xandri O, Gao Y, Jiang J, et al. Comprehensive analyses of  
671 723 transcriptomes enhance genetic and biological interpretations for complex traits in cattle.  
672 *Genome Res*. 2020;:gr.250704.119.
- 673 34. Shen Y, Zhang F, Li F, Jiang X, Yang Y, Li X, et al. Loss-of-function mutations in  
674 *QRICH2* cause male infertility with multiple morphological abnormalities of the sperm  
675 flagella. *Nat Commun*. 2019;10:433.
- 676 35. Kherraf Z-E, Cazin C, Coutton C, Amiri-Yekta A, Martinez G, Boguenet M, et al. Whole  
677 exome sequencing of men with multiple morphological abnormalities of the sperm flagella  
678 reveals novel homozygous *QRICH2* mutations. *Clinical Genetics*. 2019;96:394–401.
- 679 36. Xu W, Li XL. Exome sequencing identifying additional *QRICH2* mutations in oligo-  
680 astheno-teratozoospermia and asthenospermia patients. *Fertility and Sterility*. 2019;112:e376.
- 681 37. Jung S, Pausch H, Langenmayer MC, Schwarzenbacher H, Majzoub-Altweck M,  
682 Gollnick NS, et al. A nonsense mutation in *PLD4* is associated with a zinc deficiency-like  
683 syndrome in Fleckvieh cattle. *BMC Genomics*. 2014;15:623.
- 684 38. Schwarzenbacher H, Wurmser C, Flisikowski K, Misurova L, Jung S, Langenmayer MC,  
685 et al. A frameshift mutation in *GON4L* is associated with proportionate dwarfism in  
686 Fleckvieh cattle. *Genetics Selection Evolution*. 2016;48:25.
- 687 39. Zhang Q, Calus MPL, Bosse M, Sahana G, Lund MS, Guldbbrandtsen B. Human-  
688 Mediated Introgression of Haplotypes in a Modern Dairy Cattle Breed. *Genetics*.  
689 2018;209:1305–17.
- 690 40. Pausch H, Ammermüller S, Wurmser C, Hamann H, Tetens J, Drögemüller C, et al. A  
691 nonsense mutation in the *COL7A1* gene causes epidermolysis bullosa in Vorderwald cattle.  
692 *BMC Genet*. 2016;17:149.
- 693 41. Schwarzenbacher H, Burgstaller J, Seefried FR, Wurmser C, Hilbe M, Jung S, et al. A  
694 missense mutation in *TUBD1* is associated with high juvenile mortality in Braunvieh and  
695 Fleckvieh cattle. *BMC Genomics*. 2016;17:400.
- 696 42. Wu X, Mesbah-Uddin M, Guldbbrandtsen B, Lund MS, Sahana G. Novel haplotypes  
697 responsible for prenatal death in Nordic Red and Danish Jersey cattle. *Journal of Dairy*  
698 *Science*. 2020;103:4570–8.
- 699 43. Oud MS, Houston BJ, Volozonoka L, Mastrosoa FK, Holt GS, Alobaidi BKS, et al.  
700 Exome sequencing reveals variants in known and novel candidate genes for severe sperm  
701 motility disorders. *Human Reproduction*. 2021;36:2597–611.
- 702 44. Brogna S, Wen J. Nonsense-mediated mRNA decay (NMD) mechanisms. *Nat Struct Mol*  
703 *Biol*. 2009;16:107–13.



- 704 45. Lindeboom RGH, Vermeulen M, Lehner B, Supek F. The impact of nonsense-mediated  
705 mRNA decay on genetic disease, gene editing and cancer immunotherapy. *Nat Genet.*  
706 2019;51:1645–51.
- 707 46. Teran NA, Nachun DC, Eulalio T, Ferraro NM, Smail C, Rivas MA, et al. Nonsense-  
708 mediated decay is highly stable across individuals and tissues. *The American Journal of*  
709 *Human Genetics.* 2021;108:1401–8.
- 710 47. Bourneuf E, Otz P, Pausch H, Jagannathan V, Michot P, Grohs C, et al. Rapid Discovery  
711 of De Novo Deleterious Mutations in Cattle Enhances the Value of Livestock as Model  
712 Species. *Scientific Reports.* 2017;7:11466.
- 713 48. Reynolds EGM, Neeley C, Lopdell TJ, Keehan M, Dittmer K, Harland CS, et al. Non-  
714 additive association analysis using proxy phenotypes identifies novel cattle syndromes. *Nat*  
715 *Genet.* 2021;53:949–54.
- 716 49. Fang Z-H, Pausch H. Multi-trait meta-analyses reveal 25 quantitative trait loci for  
717 economically important traits in Brown Swiss cattle. *BMC Genomics.* 2019;20:695.
- 718 50. Nosková A, Wurmser C, Crysanto D, Sironen A, Uimari P, Fries R, et al. Deletion of  
719 porcine BOLL is associated with defective acrosomes and subfertility in Yorkshire boars.  
720 *Animal Genetics.* 2020;51:945–9.
- 721 51. Sunyaev SR. Inferring causality and functional significance of human coding DNA  
722 variants. *Hum Mol Genet.* 2012;21:R10–7.
- 723 52. MacArthur DG, Manolio TA, Dimmock DP, Rehm HL, Shendure J, Abecasis GR, et al.  
724 Guidelines for investigating causality of sequence variants in human disease. *Nature.*  
725 2014;508:469–76.
- 726
- 727

## 728 Figures

### 729 Figure 1: A 1-bp deletion is a candidate causal variant for a sperm morphology defect in 730 Brown Swiss bulls.

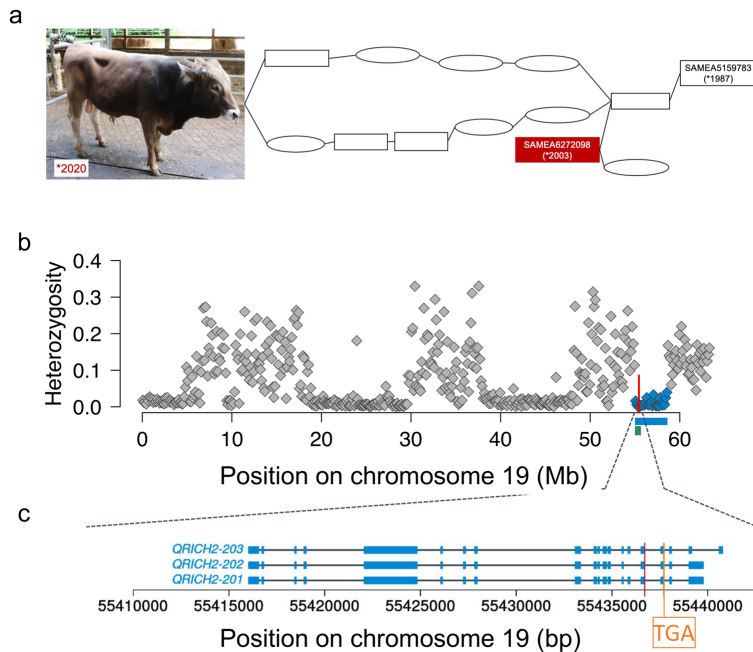

731

732 a) Pedigree of two bulls with a defect of sperm heads and tails. The pedigree only contains  
733 suspected carriers of the mutation. Ovals and rectangles represent cows and bulls,  
734 respectively. The bull born in 2020 and SAMEA6272098 are related through a common  
735 ancestor. SAMEA5159783 is the oldest sequenced mutation carrier in the pedigree. b) Each  
736 symbol represents the proportion of heterozygous genotypes observed within a 125 kb  
737 window for SAMEA6272098. Blue colour represents a 3.625 Mb segment of extended  
738 homozygosity encompassing BTA19:55436705TC>T (red vertical line). The green rectangle  
739 indicates the position of a BovineHD-based haplotype that encompasses the 1-bp deletion. c)  
740 Structure of bovine *QRICH2* isoforms with transcript-IDs ENSBTAT00000065208,  
741 ENSBTAT00000064147, and ENSBTAT00000018337 encoding proteins with 1968  
742 (ENSBTAP00000055962), 1934 (ENSBTAP00000054965) and 1827  
743 (ENSBTAP00000018337) amino acids. Blue rectangles represent exons. The red vertical line  
744 indicates the position of the 1-bp deletion (BTA19:55436705TC>T). Orange colour indicates  
745 the position of a premature termination codon “TGA” that is introduced due to the shift in  
746 translation caused by the 1-bp deletion.

747

748 **Figure 2: Sperm of a bull homozygous for the 1-bp deletion and of a control bull.**

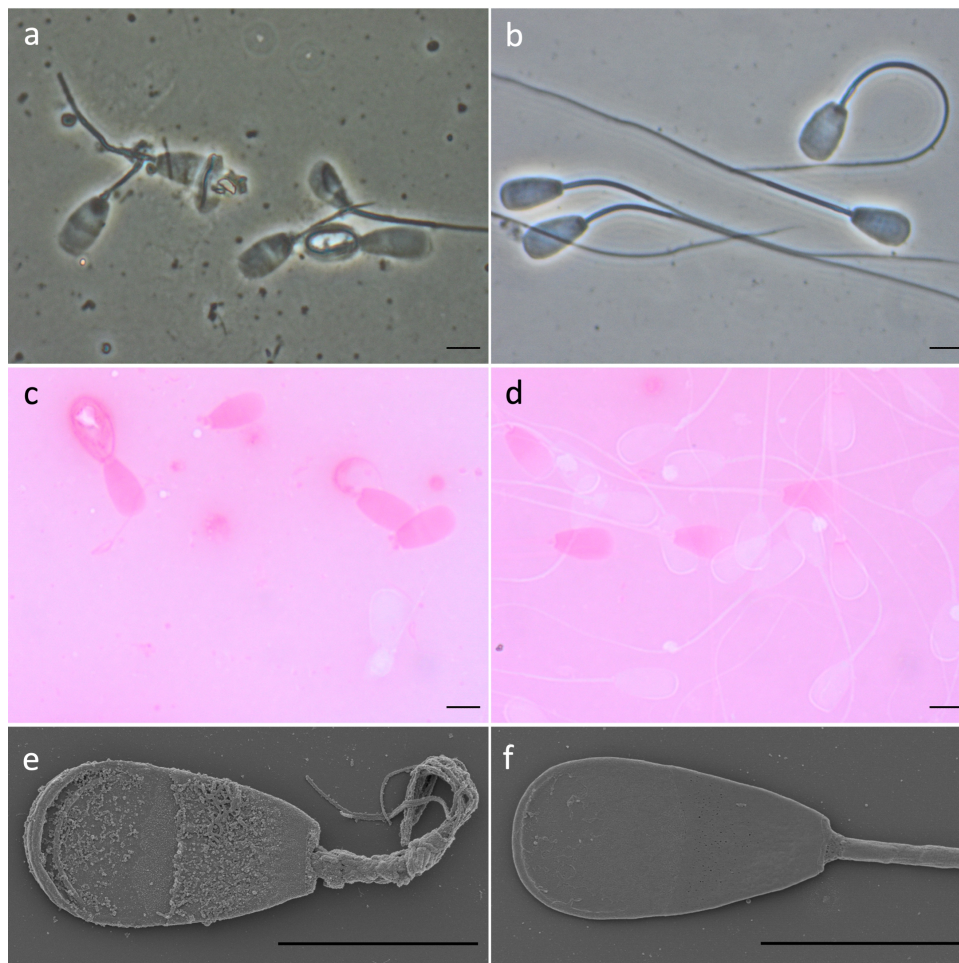

749

750 Representative phase-contrast (a, b), eosin-nigrosin stained (c, d), and scanning electron  
751 microscopy images (e, f) of sperm of a bull homozygous for the 1-bp deletion (a, c, e) and of  
752 a control bull (b, d, f) with normal sperm quality. Sperm of the affected bull show multiple  
753 morphological abnormalities of head and flagella (a). Phase-contrast microscopy also  
754 revealed numerous cell debris particles. Viable sperm remain unstained and appear white in  
755 eosin-nigrosin stained images whereas dead sperm are stained and appear purple (c, d).  
756 Flagella of the affected bull are irregularly shaped and mostly have an uneven surface (e).  
757 Scale bar: 5 $\mu$ m

758

759 **Figure 3: Transmission electron microscopy cross-sections of bovine sperm flagella.**

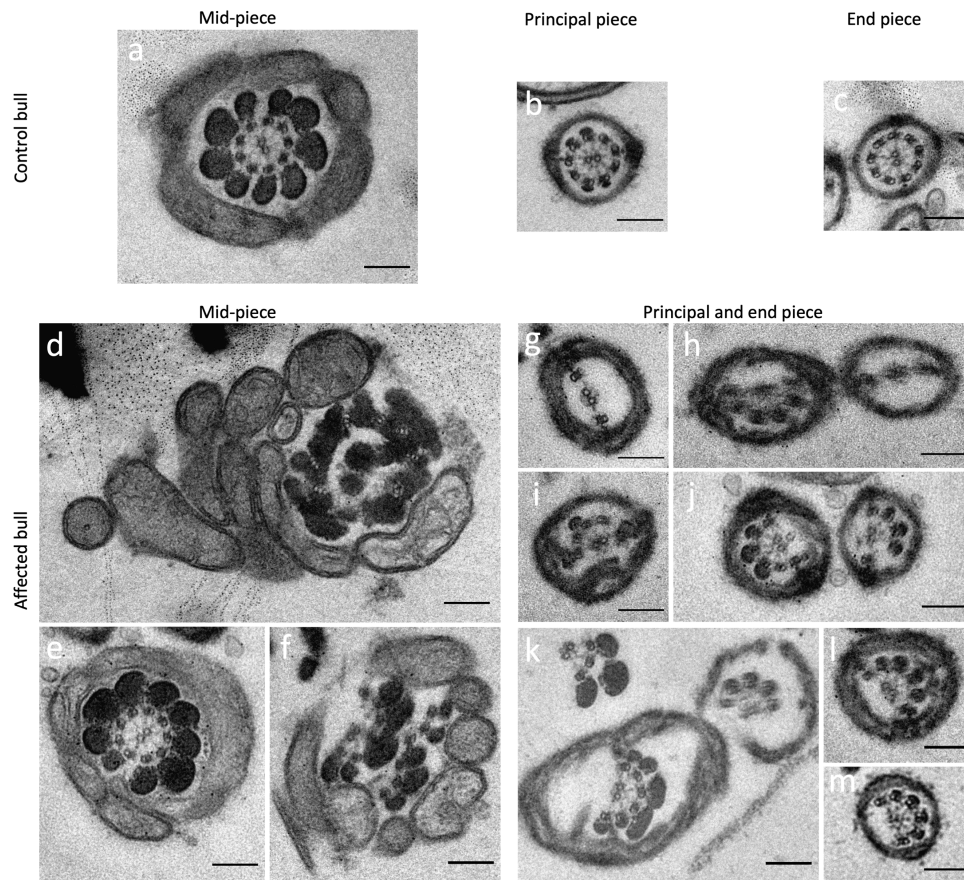

760

761 Representative TEM cross-sections of sperm flagella at the mid-piece, principal piece and  
762 end piece in a control bull (a-c) and a bull homozygous for the 1-bp deletion in *QRICH2* (d-  
763 m). Irregularities in the flagellar cross-sections from the homozygous bull prevent  
764 unambiguous assignment of the principal and end piece (g-m). The axonemes of most  
765 flagella lack some of the outer microtubules resulting in deviations from the typical  
766 arrangement of nine outer microtubule doublets surrounding the central pair in the  
767 homozygous bull. Cross-sections also show irregular assembly of axonemes and structures  
768 such as outer dense fibres that are supposed to enclose the axonemes (d, f). Scale bar: 200nm.

769

## 770 **Additional Files**

### 771 **Additional file 1 File S1**

772 File format: xlsx

773 Title: Sequence read archive accessions for the sequenced animals.

774 Description: The spreadsheet file contains accessions from the European Nucleotide Archive  
775 that point to sequencing data for cattle from various breeds. The data in the file are organised  
776 in three spreadsheets. The accession for the bull that produced ejaculates with poor quality is  
777 listed in «case\_SRA\_ID». Accessions for 397 fertile control animals from various breeds are  
778 listed in «controls\_SRA\_IDs». Accessions, sequence-based genotypes and haplotypes for 285  
779 cattle used to assign the 1-bp deletion onto a haplotype are listed in «array-based genotypes».

780

### 781 **Additional file 2 File S2**

782 File format: txt

783 Title: Coordinates of a diagnostic haplotype.

784 Description: Illumina BovineHD coordinates (SNP-name, chromosome, physical position  
785 [ARS-UCD1.2]) and haplotype allele of 181 markers that define the diagnostic 675 kb  
786 haplotype.

787

### 788 **Additional file 3 File S3**

789 File format: xlsx

790 Title: Accessions for the eQTL cohort.

791 Description: Accessions for sequencing reads obtained from RNA and DNA prepared from  
792 testis tissue of 76 mature bulls.

793

### 794 **Additional file 4 File S4**

795 File format: xlsx

796 Title: Candidate causal variants.

797 Description: Functional consequences predicted for 1655 variants compatible with recessive  
798 inheritance based on the Ensembl (version 104) and Refseq (version 106) annotation of the  
799 bovine genome.

800

801

802

803 **Additional file 5 File S5**

804 File format: png

805 Title: *QRICH2* mRNA analysis.

806 Description: a) Exon-specific expression (quantified in transcripts per million [TPM]) for  
807 *QRICH2* in testis tissue of six heterozygous (green) and 70 homozygous wild-type (grey)  
808 bulls. b) Integrative Genomics Viewer coverage tracks from RNA sequence read alignments  
809 overlapping the frameshift-inducing 1-bp deletion (red arrow) in six heterozygous bulls. The  
810 identifiers of the coverage tracks refer to accessions from the sequence read archive.

811

812 **Additional file 6 File S6**

813 File format: png

814 Title: DNA sequence alignment of SAMEA6272098.

815 Description: Output from «samtools tview» centered on BTA19:55436705TC>T representing  
816 DNA sequence read alignments from a bull (SAMEA6272098) that carries the 675 kb  
817 haplotype in the heterozygous state, but was genotyped as homozygous for the reference  
818 allele at position of the BTA19:55436705TC>T variant. The asterisk within the only read  
819 overlapping BTA19:55436706 indicates that the bull carries the 1-bp deletion.

820

821 **Additional file 7 File S7**

822 File format: tif

823 Title: Phase-contrast images of sperm from a bull homozygous for the 1-bp deletion.

824 Description: All images display sperm with major sperm head and/or flagellar defects. Very  
825 short, shortened or absent flagella were the most prevalent flagellar abnormalities: very short  
826 flagella (a, b, d, e, f, g, i, k, s, u), shortened flagella (c, e, h, i, l, q, r), and absent flagella (c, i,  
827 j, o, t). Short doubled (e, k, s) or short thickened (e, k, i, n, q) were apparent too. Some  
828 flagella were strongly folded (m, y right sperm) or coiled (y left sperm). Many sperm showed  
829 defective heads additionally to the defective flagella: pyriform (c, i, m, s, t), round (g, r),  
830 abnormal contour (p), and diadem defect/vacuoles (b, o, q, u, y). Underdeveloped sperm with  
831 the flagella strongly folded around the sperm head are considered the most severe sperm  
832 defects in bull (d right sperm, t right sperm, v, w, x). Scale bar: 5µm.

833

834

835

836

837 **Additional file 8 File S8**

838 File format: tif

839 Title: TEM and SEM images of sperm from a bull homozygous for the 1-bp deletion.

840 Description: TEM cross-section of an underdeveloped sperm with multiple flagellar  
841 structures next to the nucleus (black) enclosed by a cell membrane (a). Underdeveloped  
842 sperm with flagellum curled on head visualized using SEM (b). Longitudinal TEM cross-  
843 section (c) and SEM (d) of sperms with a thickened vesicularized structure at the sperm neck  
844 and multiple disorganized flagellar structures at the mid-piece. Longitudinal TEM cross-  
845 section of the neck region of a normal sperm from a control bull (e). Scale bar: 1  $\mu$ m.
